# Supplementary material for: Enhancing hydrogen evolution reaction activity through defects and strain engineering in monolayer MoS2
Source: Royal Society of Chemistry journal article supplement (doi:10.1039/d4sc04874a), 2024-01-01
Supplement: d4sc04874a1.pdf [file d4sc04874a1.pdf]

## Supplementary Information

### Enhancing Hydrogen Evolution Reaction Activity Through Defects and Strain Engineering in Monolayer MoS<sub>2</sub>

Renjith Nadarajan, Sraboni Dey, Arijit Kayal, Joy Mitra, Manikoth M. Shaijumon\*

School of Physics, Indian Institute of Science Education and Research Thiruvananthapuram, Maruthamala PO, Thiruvananthapuram, Kerala 695551, India.

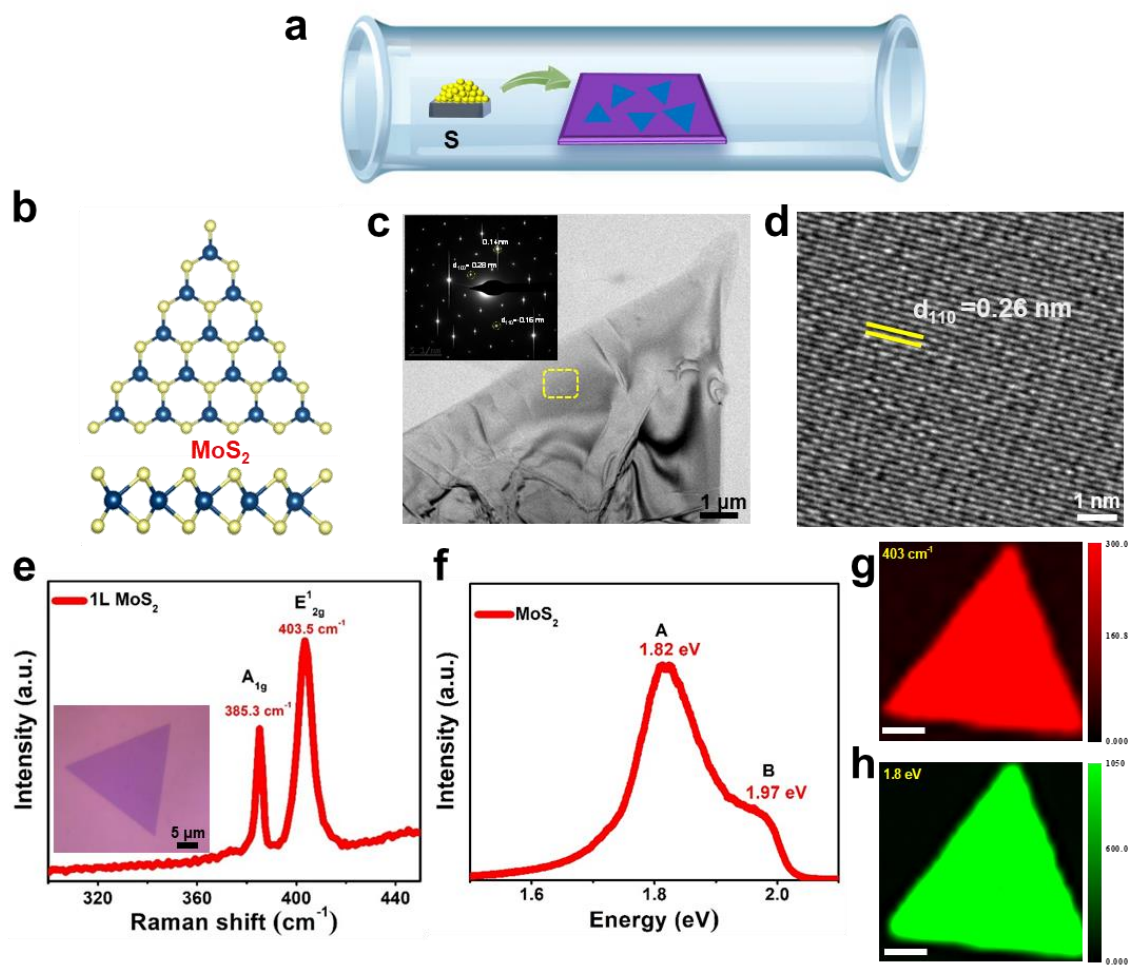

**Fig. S1** (a) Schematic illustration of the CVD growth of MoS<sub>2</sub> (b) Schematic crystal configuration of monolayer MoS<sub>2</sub> (c) TEM and (d) HRTEM images of MoS<sub>2</sub> inset of (c) shows the SAED pattern (e) Raman and (f) PL spectra of MoS<sub>2</sub> monolayer, inset of S1e shows the optical image (g) Raman map image of A<sub>1g</sub> mode (403 cm<sup>-1</sup>) and (h) PL map image (A exciton) at 1.82 eV of MoS<sub>2</sub> monolayer (scale bar shows 5 μm)

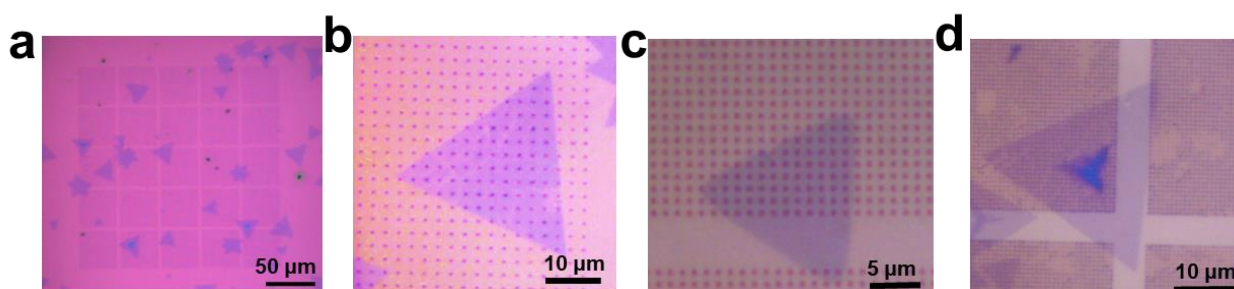

**Fig. S2** Optical images of (a, b) S<sub>2μm</sub>-MoS<sub>2</sub> (c) S<sub>1μm</sub>-MoS<sub>2</sub> (d) S<sub>0.5μm</sub>-MoS<sub>2</sub>

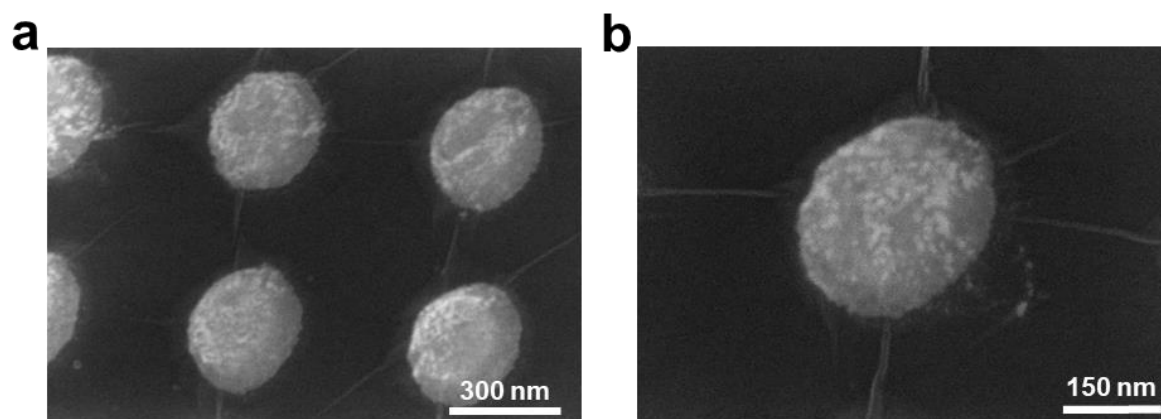

Fig. S3 (a, b) SEM image of S<sub>0.5</sub>μm-MoS<sub>2</sub>

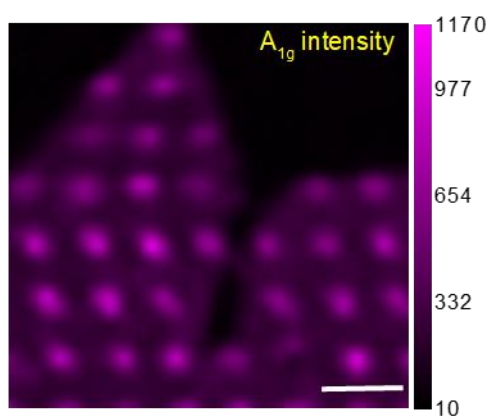

Fig. S4 Raman A<sub>1g</sub> intensity map image (scale bar 2 μm)

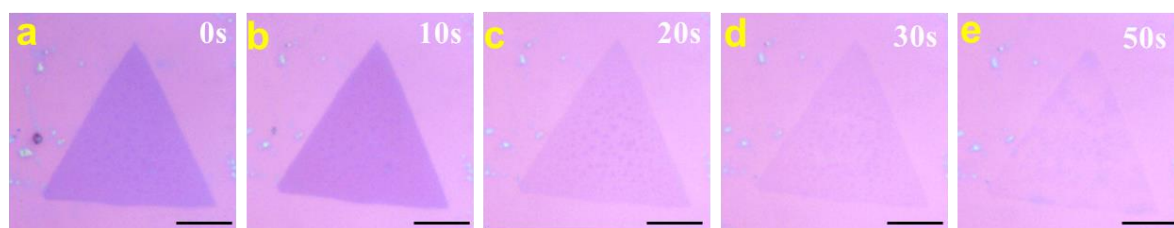

Fig. S5 (a-e) Optical images of MoS<sub>2</sub> monolayer flakes under plasma treatment (scale bar 10 μm)

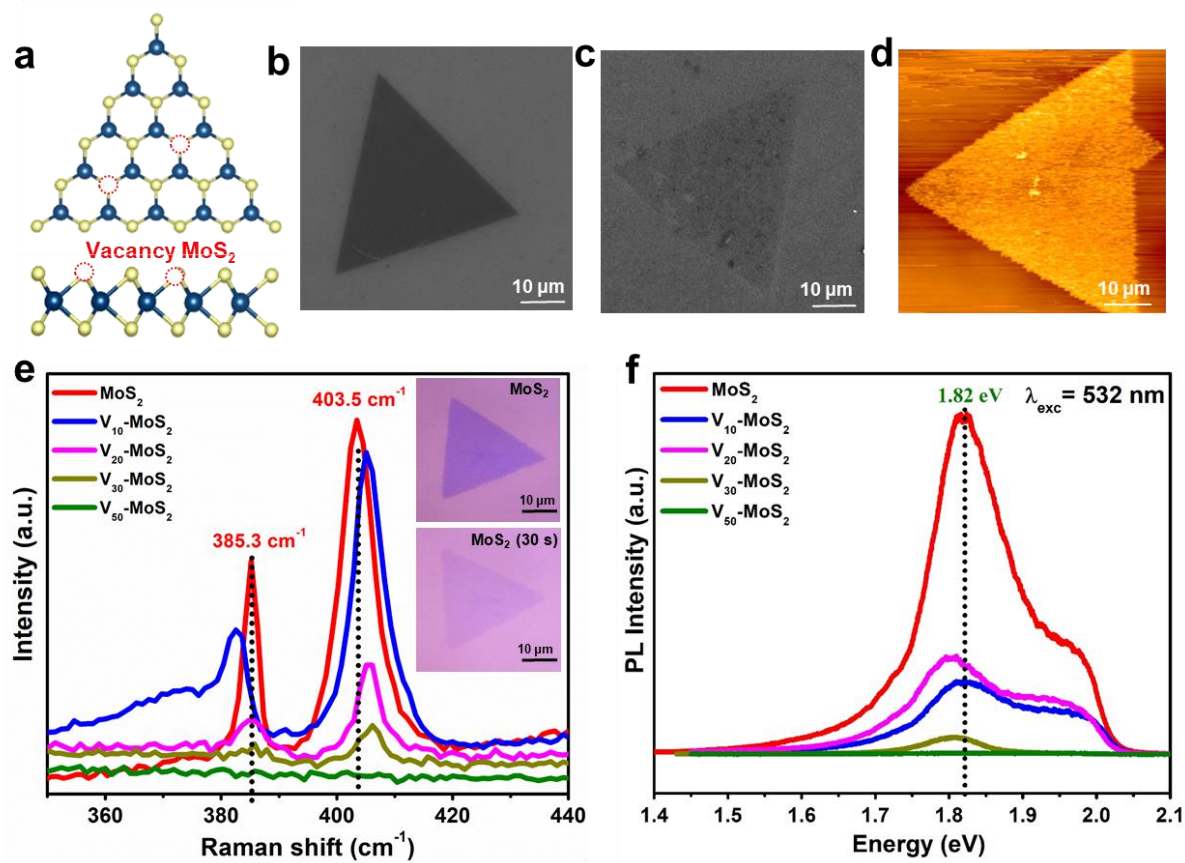

**Fig. S6** (a) Schematic crystal configuration of vacancy MoS<sub>2</sub>. SEM images of (b) MoS<sub>2</sub> monolayer and (c) V-MoS<sub>2</sub>, respectively (d) AFM image of MoS<sub>2</sub> monolayer under plasma treatment for 30 s (V<sub>30</sub>-MoS<sub>2</sub>) (e) Raman and (f) PL spectra of MoS<sub>2</sub> monolayer under different time of plasma treatment inset of (e) showing the optical images of MoS<sub>2</sub> and V<sub>30</sub>-MoS<sub>2</sub>.

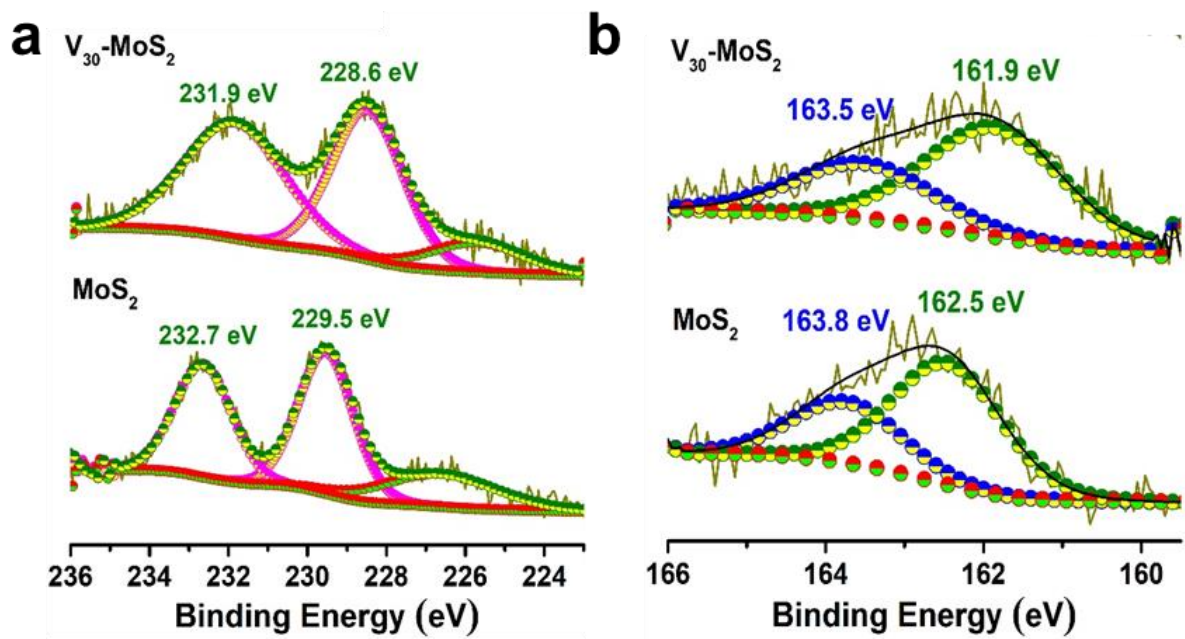

Fig. S7 XPS spectra (a) Mo 3d (b) S 2p of  $\text{MoS}_2$  and  $\text{V}_{30}\text{-MoS}_2$

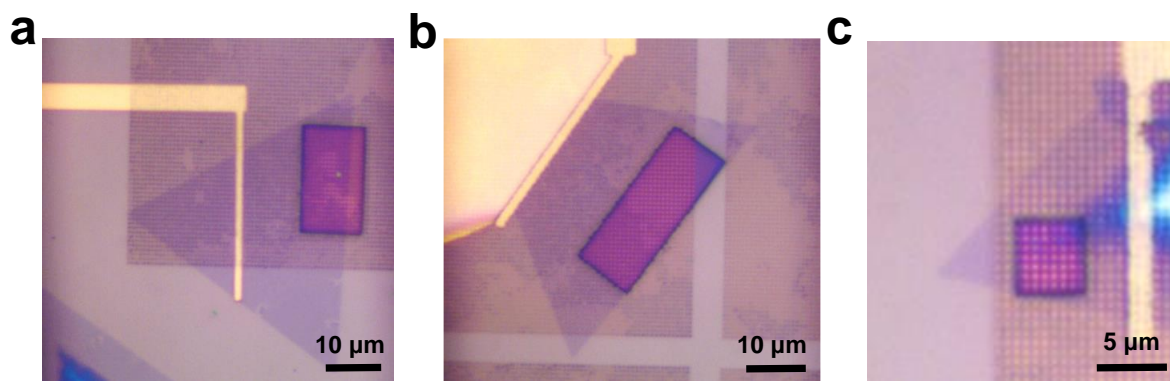

Fig. S8 (a) photograph of the microcell assembly (b-d) Optical images of various  $\text{S}_{0.5\mu\text{m}}\text{MoS}_2$  devices

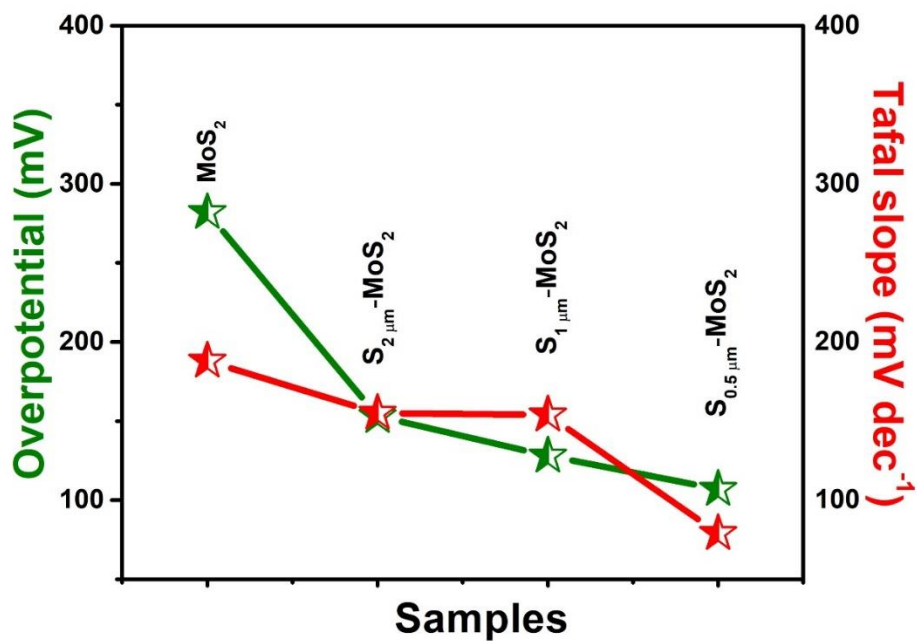

Fig. S9 The overpotential and the Tafel slope for the different strained samples ( $S\text{-MoS}_2$ )

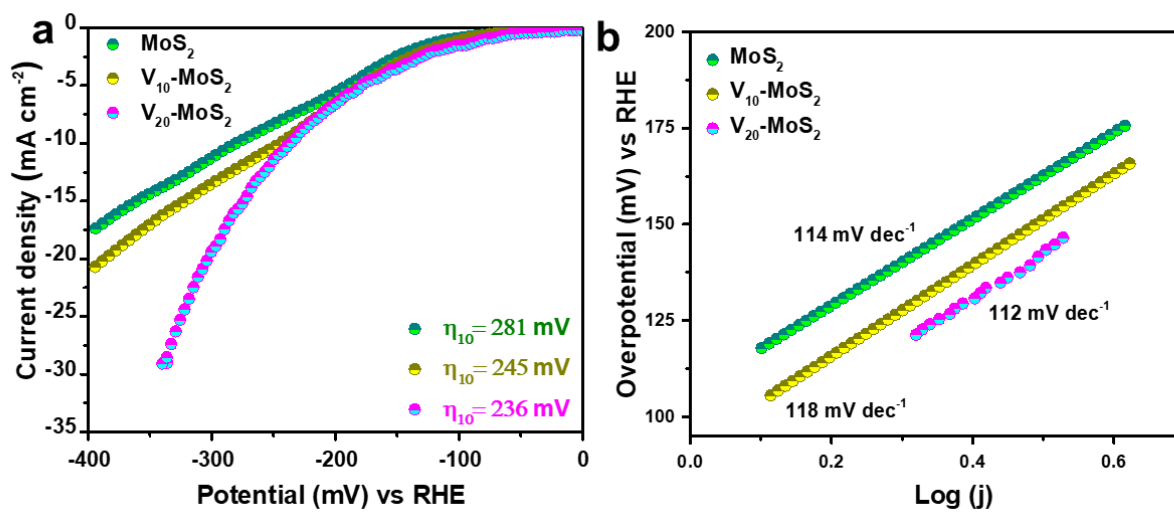

Fig. S10 a) LSV and (b) Tafel curve of  $\text{MoS}_2$ ,  $V_{10}\text{-MoS}_2$  and  $V_{20}\text{-MoS}_2$ .

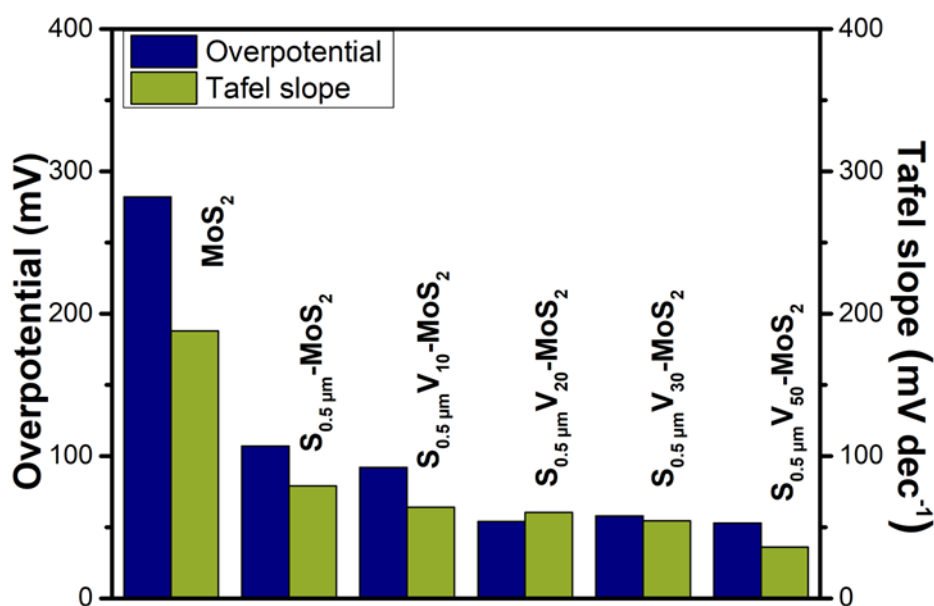

Fig. S11 Comparison bar plots of overpotential and the Tafel slope for the different SV-MoS<sub>2</sub> samples

Table S1 Comparison of HER performance of engineered TMDs-based electrocatalysts.

| Modification method                           | Material                          | Before modification       | After modification       | References |
|-----------------------------------------------|-----------------------------------|---------------------------|--------------------------|------------|
| Strained and vacancy                          | MoS <sub>2</sub>                  | 382 mV                    | 53 mV                    | This work  |
|                                               |                                   | 186 mV dec <sup>-1</sup>  | 118 mV dec <sup>-1</sup> |            |
|                                               | WS <sub>2</sub> @C                | --                        | 117 mV                   | 1          |
|                                               |                                   | 98 mV dec <sup>-1</sup>   | 56 mV dec <sup>-1</sup>  |            |
|                                               | SV-MoS <sub>2</sub>               | --                        | 170 mV                   | 2          |
|                                               |                                   | 98 mV dec <sup>-1</sup>   | 60 mV dec <sup>-1</sup>  |            |
| V <sub>s</sub> -MoS <sub>2</sub> on 90 nm NCs | 498 mV                            | 234 mV                    | 3                        |            |
|                                               | 156.4 mV dec <sup>-1</sup>        | 79.7 mV dec <sup>-1</sup> |                          |            |
| Gating                                        | ReS <sub>2</sub> /WS <sub>2</sub> | 210 mV                    | 49 mV                    | 4          |
|                                               |                                   | 115 mV dec <sup>-1</sup>  | 35 mV dec <sup>-1</sup>  |            |
|                                               | Treated VSe <sub>2</sub>          | 126 mV                    | 70 mV                    | 5          |

|                           |                                    |                          |                          |    |
|---------------------------|------------------------------------|--------------------------|--------------------------|----|
|                           |                                    | 70 mV dec <sup>-1</sup>  | 59 mV dec <sup>-1</sup>  |    |
|                           | MoS <sub>2</sub>                   | 240 mV                   | 38 mV                    | 6  |
|                           |                                    | 200 mV dec <sup>-1</sup> | 110 mV dec <sup>-1</sup> |    |
| <b>Interface</b>          | MoS <sub>2</sub> /WTe <sub>2</sub> | --                       | 140 mV                   | 7  |
|                           |                                    | --                       | 40 mV dec <sup>-1</sup>  |    |
| <b>Defects/ Vacancies</b> | 3CoMo-Vs                           | 317 mV                   | 75 mV                    | 8  |
|                           | MoS <sub>2</sub>                   | 175 mV dec <sup>-1</sup> | 57 mV dec <sup>-1</sup>  |    |
|                           | MoS <sub>2</sub>                   | 384 mV                   | 266 mV                   | 9  |
|                           |                                    | 139 mV dec <sup>-1</sup> | 90 mV dec <sup>-1</sup>  |    |
|                           | FD-MoS <sub>2</sub>                | 358 mV                   | 164 mV                   | 10 |
|                           |                                    | 165 mV dec <sup>-1</sup> | 36 mV dec <sup>-1</sup>  |    |
|                           | 1T'-MoTe <sub>2</sub>              | 280 mV                   | 140 mV                   | 11 |
|                           |                                    | 185 mV dec <sup>-1</sup> | 160 mV dec <sup>-1</sup> |    |
| <b>Phase engineering</b>  | 1T-MoS <sub>2</sub>                | —                        | 175 mV                   | 12 |
|                           |                                    | 180 mV dec <sup>-1</sup> | 100 mV dec <sup>-1</sup> |    |
|                           | 1T'-MoTe <sub>2</sub>              | 650 mV                   | 356 mV                   | 13 |
|                           |                                    | 184 mV dec <sup>-1</sup> | 127 mV dec <sup>-1</sup> |    |
|                           | 1T'-MoS <sub>2</sub>               | 286 mV                   | 205 mV                   | 14 |
|                           |                                    | 70 mV dec <sup>-1</sup>  | 51 mV dec <sup>-1</sup>  |    |
| <b>Doping</b>             | Co-MoS <sub>2</sub>                | 345 mV                   | 137 mV                   | 15 |
|                           |                                    | 143 mV dec <sup>-1</sup> | 59 mV dec <sup>-1</sup>  |    |
|                           | Mn-doped MoS <sub>2</sub>          | 369 mV                   | 318 mV                   | 16 |
|                           |                                    | 105 mV dec <sup>-1</sup> | 82 mV dec <sup>-1</sup>  |    |



## Reference

- 1 W. Han, Z. Liu, Y. Pan, G. Guo, J. Zou, Y. Xia, Z. Peng, W. Li and A. Dong, *Adv. Mater.*, 2020, **32**, 1–9.
- 2 H. Li, C. Tsai, A. L. Koh, L. Cai, A. W. Contryman, A. H. Fragapane, J. Zhao, H. S. Han, H. C. Manoharan, F. Abild-Pedersen, J. K. Nørskov and X. Zheng, *Nat. Mater.*, 2016, **15**, 48–53.
- 3 X. Liu, Z. Li, H. Jiang, X. Wang, P. Xia, Z. Duan, Y. Ren, H. Xiang, H. Li, J. Zeng, Y. Zhou and S. Liu, *Small*, 2024, **20**, 2307293.
- 4 X. Zhu, C. Wang, T. Wang, H. Lan, Y. Ding, H. Shi, L. Liu, H. Shi, L. Wang, H. Wang, Y. Ding, Y. Fu, M. Zeng and L. Fu, *Adv. Mater.*, 2022, **34**, 2202479.
- 5 M. Yan, X. Pan, P. Wang, F. Chen, L. He, G. Jiang, J. Wang, J. Z. Liu, X. Xu, X. Liao, J. Yang and L. Mai, *Nano Lett.*, 2017, **17**, 4109–4115.
- 6 J. Wang, M. Yan, K. Zhao, X. Liao, P. Wang, X. Pan, W. Yang and L. Mai, *Adv. Mater.*, 2017, **29**, 1604464.
- 7 Y. Zhou, J. V. Pondick, J. L. Silva, J. M. Woods, D. J. Hynek, G. Matthews, X. Shen, Q. Feng, W. Liu, Z. Lu, Z. Liang, B. Brena, Z. Cai, M. Wu, L. Jiao, S. Hu, H. Wang, C. M. Araujo and J. J. Cha, *Small*, 2019, **15**, 1–11.
- 8 Y. Zhou, J. Zhang, E. Song, J. Lin, J. Zhou, K. Suenaga, W. Zhou, Z. Liu, J. Liu, J. Lou and H. J. Fan, *Nat. Commun.*, 2020, **11**, 2253.
- 9 C. Zhu, M. Yu, J. Zhou, Y. He, Q. Zeng, Y. Deng, S. Guo, M. Xu, J. Shi, W. Zhou, L. Sun, L. Wang, Z. Hu, Z. Zhang, W. Guo and Z. Liu, *Nat. Commun.*, 2020, **11**, 772.
- 10 J. Xu, G. Shao, X. Tang, F. Lv, H. Xiang, C. Jing, S. Liu, S. Dai, Y. Li, J. Luo and Z. Zhou, *Nat. Commun.*, 2022, **13**, 2193.
- 11 H. You, Z. Zhuo, X. Lu, Y. Liu, Y. Guo, W. Wang, H. Yang, X. Wu, H. Li and T. Zhai, *CCS Chem.*, 2019, **1**, 396–406.
- 12 Y. Yu, G. H. Nam, Q. He, X. J. Wu, K. Zhang, Z. Yang, J. Chen, Q. Ma, M. Zhao, Z. Liu, F. R. Ran, X. Wang, H. Li, X. Huang, B. Li, Q. Xiong, Q. Zhang, Z. Liu, L. Gu, Y. Du, W. Huang and H. Zhang, *Nat. Chem.*, 2018, **10**, 638–643.
- 13 J. Seok, J.-H. Lee, S. Cho, B. Ji, H. W. Kim, M. Kwon, D. Kim, Y.-M. Kim, S. H. Oh, S. W. Kim, Y. H. Lee, Y.-W. Son and H. Yang, *2D Mater.*, 2017, **4**, 025061.
- 14 L. Liu, J. Wu, L. Wu, M. Ye, X. Liu, Q. Wang, S. Hou, P. Lu, L. Sun, J. Zheng, L. Xing, L. Gu, X. Jiang, L. Xie and L. Jiao, *Nat. Mater.*, 2018, **17**, 1108–1114.
- 15 H. Duan, C. Wang, G. Li, H. Tan, W. Hu, L. Cai, W. Liu, N. Li, Q. Ji, Y. Wang, Y. Lu, W. Yan, F. Hu, W. Zhang, Z. Sun, Z. Qi, L. Song and S. Wei, *Angew. Chemie Int. Ed.*, 2021, **60**, 7251–7258.
- 16 Z. Cai, T. Shen, Q. Zhu, S. Feng, Q. Yu, J. Liu, L. Tang, Y. Zhao, J. Wang, B. Liu and H. Cheng, *Small*, 2020, **16**, 1–9.
